# Adaptive pathways of coral populations on the Great Barrier Reef

Mikhail V. Matz<sup>1\*</sup>, Eric A. Trembl<sup>2</sup>, Galina V. Aglyamova<sup>1</sup>, Madeleine J. H. van Oppen<sup>2,3</sup>  
and Line K. Bay<sup>3</sup>

<sup>1</sup> Department of Integrative Biology, University of Texas at Austin, 205 W 24th St. C0990,  
Austin, Texas 78712, USA

<sup>2</sup> School of BioSciences, University of Melbourne, Victoria 3010 Australia

<sup>3</sup> Australian Institute of Marine Science, QLD, Australia

\* Author for correspondence, [matz@utexas.edu](mailto:matz@utexas.edu)

## Abstract

Reef-building corals are extremely important for maintenance of marine biodiversity and coastal economy and are currently under severe threat from anthropogenic warming. Warming is predicted to drive preferential survival of warm-adapted genotypes that have migrated to cooler locations and result in an overall decline in genetic diversity due to bleaching-related mortality. To quantify these trends, we analyzed five populations of a common coral *Acropora millepora* along the latitudinal extent of the Great Barrier Reef (GBR). Population genomic analysis revealed that most populations were demographically distinct and that migration was indeed preferential southward, from lower (warmer) to higher (cooler) latitudes. However, no recent increase in southward migration was detectable, and inferred migration rates remained closely correlated with predictions of a biophysical model of larval dispersal based on ocean currents. There was also no evidence of recent declines in genetic diversity: populations of *A. millepora* expanded during the period of rapid sea level changes 100-500 thousand years ago and remained relatively stable since then, with the exception of one population suffering from frequent environmental disturbances. A multi-locus adaptation model indicated that standing genetic variation spread across latitudes should be sufficient to fuel continuous adaptation of *A. millepora* metapopulation to warming over the next 100-200 years. Unexpectedly, we found that naturally low heritability of thermal tolerance in reef-building corals due to contribution from horizontally transmitted algal symbionts would facilitate longer metpopulation persistence. Still, our model also predicted increase in severity of local mortality events induced by thermal anomalies.

**Significance statement:** Can long-lived organisms such as reef-building corals adapt fast enough to keep up with the historically unprecedented rate of sea surface warming? Here we combine population genomics, biophysical modeling, and evolutionary simulations to argue that populations of a common reef-building coral (*Acropora millepora*) spread across latitudes on the Great Barrier Reef should harbor sufficient genetic variation to fuel efficient adaptation to increasing temperature for another century and perhaps longer. Our study underscores the key role of standing genetic variation in the future persistence of coral reefs and calls for novel reef management strategies to facilitate natural adaptation process.

42 Hot water coral bleaching, caused by global warming, is devastating coral reefs around the world  
43 (*1*) but there is room for hope if corals can adapt to increasing temperatures. Many coral species  
44 have wide distributions that span environments that differ dramatically in their thermal regimes,  
45 demonstrating that efficient thermal adaptation has occurred in the past (*2*). But can coral  
46 adaptation keep up with the unprecedentedly rapid current rate of global warming (*3*)? One way  
47 for corals to achieve rapid thermal adaptation is through genetic rescue, involving the spread of  
48 existing heat tolerance alleles from low-latitude, warm-adapted populations to higher-latitude,  
49 warming regions, via larval migration (*4, 5*). We have previously demonstrated the presence of  
50 genetic variants conferring high thermal tolerance in a low-latitude *A. millepora* population (*4*). It  
51 can be expected that global warming will cause preferential survival of warm-adapted poleward  
52 migrants because they will be following their thermal optimum, whereas individuals migrating in  
53 the opposite direction would find themselves in increasingly mismatched environments (Fig. 1 A,  
54 B). Another likely population-level effect of recent declines in coral cover (*6*) is a reduction in  
55 overall genetic diversity, potentially limiting both the scope and the rate of adaptation.

56  
57 Here, we test these predictions in *Acropora millepora*, a common reef-building coral from the  
58 most ecologically prominent and diverse coral genus in the Indo-Pacific (staghorn corals,  
59 *Acropora*). We have analyzed genome-wide genetic variation using 2bRAD (*7*) in five  
60 populations of *A. millepora* along the latitudinal range of the GBR (Fig. 1 A). We genotyped 18-  
61 28 individuals per population at >98% accuracy and with a >95% genotyping rate. Analysis of  
62 population structure based on ~11,500 biallelic SNPs separated by at least by 2,500 bases agreed  
63 with previous microsatellites results (*8, 9*), and revealed very low levels of genetic divergence,  
64 with only the Keppel Islands population being potentially different from the others (Fig. 1 D and  
65 Fig. S1). We observed increasing genetic divergence with geographical distance (“isolation by  
66 distance”, Fig. 1 C) that supports population divergence, however, pairwise  $F_{ST}$  were small and  
67 did not exceed 0.014 even between the southernmost and northernmost populations (Keppel and  
68 Wilkie). To gain a deeper insight into coral demography, we used Diffusion Approximation for  
69 Demographic Inference (*dadi*, (*10*)) to more rigorously test for population subdivision and infer  
70 pairwise migration rates among populations and population sizes. *dadi* is a coalescent-based  
71 method that optimizes parameters of a pre-specified demographic model to maximize the  
72 likelihood of generating the observed allele frequency spectrum (for two populations it is  
73 essentially a two-dimensional histogram of allele frequencies, Fig. S2). Being a likelihood-based  
74 method, *dadi* can be used to compare alternative models using likelihood ratio tests and Akaike  
75 Information Criterion (AIC).

76  
77 We used AIC to confirm that our populations are separate demographic units. For each pair of  
78 populations we generated 120 bootstrapped datasets by resampling genomic contigs and  
79 performed delta-AIC comparison of two demographic models, a split-with-migration model and a  
80 no-split model (Fig. S3 B). The split-with-migration model assumed two populations that have  
81 split some time  $T$  in the past, potentially have different sizes  $N1$  and  $N2$ , and exchange migrants  
82 at different rates ( $m12$  and  $m21$ ) depending on direction. The no-split model allowed for ancestral  
83 population size to change at time  $T$  but not for a population split, so the experimental data were

84 modeled as two random samples from the same population of size  $N$ . The majority of bootstrap  
 85 replicates (88-100%) showed AIC advantage of the split-with-migration model for all but one  
 86 pair of populations (Sudbury-Magnetic, 39% bootstrap support; Fig. S3). This indicates that the  
 87 populations are demographically distinct despite very low  $F_{ST}$ . This result highlights the power of  
 88 coalescent analysis relative to classical approaches (such as  $F_{ST}$ ) that assume genetic equilibrium,  
 89 i.e., that populations have been stable for thousands of generations.  
 90

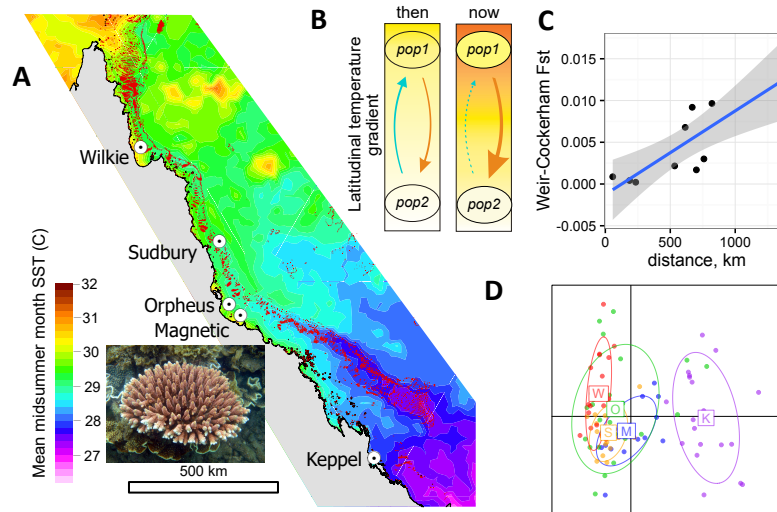

91 Figure 1. The population setting and background for our study. (A) Locations of sampled populations  
 92 where mean midsummer month sea surface temperature differed by up to  $\sim 3^{\circ}\text{C}$ . Inset: *Acropora millepora*.  
 93 (B) Working hypothesis under global warming: Warm-adapted low-latitude genotypes that migrate to  
 94 higher latitudes would be following their physiological optimum and hence expected to survive better than  
 95 migrants in the opposite direction. (C) Increase of pairwise  $F_{ST}$  with distance, both indicating weak genetic  
 96 divergence along the GBR, and (D) principal component analysis of genome-wide genetic variation. On  
 97 panel D, centroid labels are initial letters of population names as in panel A.  
 98  
 99

100 We then determined pairwise migration rates from the split-with-migration model and estimated  
 101 their confidence limits from bootstrap replicates. For all pairwise analyses except Wilkie-Sudbury  
 102 migration in southward direction exceeded northward migration, and this difference was  
 103 significant in seven out of nine cases (Fig. 2 A and Fig. S3A). Linear mixed model analysis of  
 104 direction dependent mean migration rates with a random effect of destination (to account for  
 105 variation in total migration rate) confirmed the overall significance of this southward trend  
 106 ( $P_{\text{MCMC}} < 1e-4$ ).  
 107

108 It is important to note that our pairwise migration rates captured the cumulative effect of genetic  
 109 exchange between populations, which included direct migration and the spread of alleles via other  
 110 stepping-stone populations. Such rates do not directly reflect the numbers of larvae exchanged  
 111 between populations but are very informative in the genetic rescue context. They represent the  
 112 per-generation rate of replacement of the destination population genotypes by genotypes from the

113 source population, which is essentially the rate at which genetic rescue could proceed.

114

115 To investigate whether the southward migration bias was due to higher survival of southward  
 116 migrants relative to northward migrants, as predicted under global warming (Fig. 1 B), we  
 117 developed a biophysical model of coral larval dispersal on the Great Barrier Reef. This model  
 118 quantified the per-generation migration potential among coral reef habitat patches in the GBR  
 119 based on ocean currents and parameters of larval biology (11, 12). We found that the genetic and  
 120 biophysical migration rates were very closely correlated (Mantel test:  $r = 0.79$ ,  $P = 0.008$ , Fig. 2  
 121 C). Although the biophysical model explained most of the southward migration bias in the  
 122 genetic data, the residuals were still in favor of southward migration (Fig. 2 C, inset;  $P = 0.058$ ).

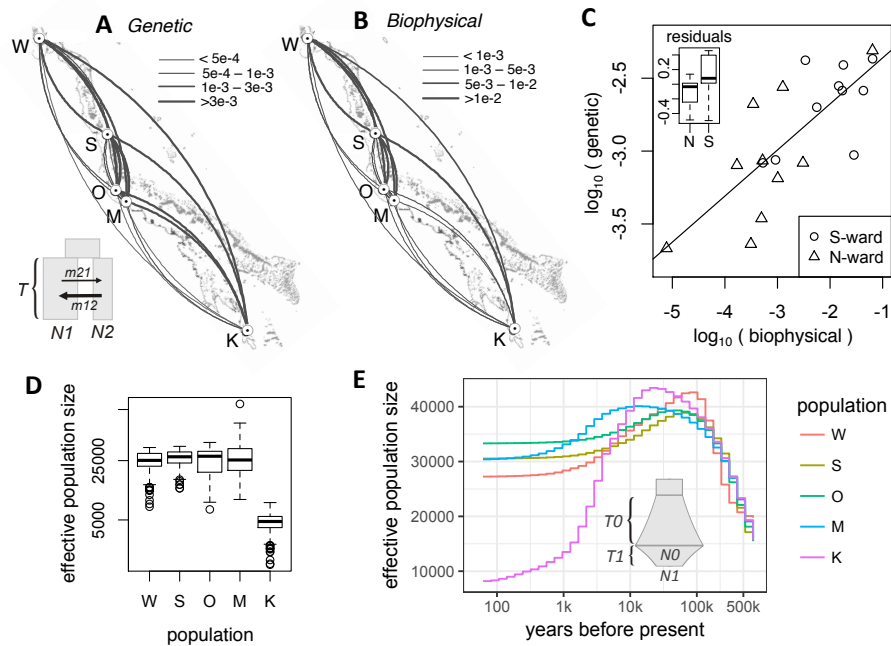

123

124

125 **Figure 2.** Demography of *A. millepora* populations on the GBR. (A) Arc-plot of migration rates among  
 126 populations reconstructed from population genetic data. Inset: *dadi* model used: ancestral population splits

127 into two populations of unequal sizes ( $N1$  and  $N2$ ) some time  $T$  in the past, these populations exchange  
 128 migrants at different rates depending on direction. (B) Migration rates according to the biophysical model.

129 On panels A and B, the arcs should be read clockwise to tell the direction of migration; line thickness is  
 130 proportional to the migration rate. (C) Correlation between  $\log$ -transformed biophysical and genetic  
 131 migration rates (Mantel  $r = 0.79$ ,  $P = 0.008$ ). Inset: box-plot of residuals from the linear regression.

132 Southward migration tends to exceed northward migration even after accounting for predictions of the  
 133 biophysical model ( $P = 0.058$ ), suggesting higher survival of southward migrants. (D) Box plot of effective  
 134 population sizes inferred by the split-with-migration model (panel A) across all population pairs and  
 135 bootstrap replicates. (E) Historical changes in effective population sizes inferred using a single-population

136 *dadi* model with two periods of exponential growth ( $T0$  and  $T1$ , reaching sizes  $N0$  and  $N1$ , inset), averaged  
 137 across bootstrap replicates.  
 138



139 While this residual excess suggest preferential survival of southward migrants, as predicted by  
140 our hypothesis (Fig. 1 B). These genetic predictions represent historical averages since the  
141 populations split and did not resolve any potential recent migration changes.

142  
143 To determine any recent changes in southward migration, we evaluated a similar basic split-with-  
144 migration model (Fig. 2A) that allowed for a change in migration over the past 75-100 years. The  
145 new model suggested some recent migration changes, but there was no consistent change between  
146 northward and southward migration (Fig. S4). Delta-AIC bootstrap analysis favored the new  
147 model over the basic one only for two pairs of populations, Wilkie-Orpheus and Wilkie-Magnetic  
148 (85 and 60% bootstrap support, respectively). We conclude that with the current data and analysis  
149 techniques we cannot yet detect the effect of recent warming on preferential direction of coral  
150 migration along the GBR.

151  
152 The GBR has already warmed by 0.8°C since the end of last century (13) and may have already  
153 reduced genetic diversity in *A. millepora* populations. We used *dadi* to infer effective population  
154 sizes, which is a measure of genetic diversity and one of the key parameters determining the  
155 population's adaptive potential (14). The results of the split-with-migration model (Fig. 2 A)  
156 were consistent for all population pairs and indicated that Keppel population was about one-fifth  
157 the size of others (Fig. 2 D, E). This result was not surprising since the Keppel population  
158 frequently suffers high mortality due to environmental disturbances and was therefore is expected  
159 to show diminished long-term effective population size (8). We also used a single-population  
160 *dadi* model that allowed for two consecutive growth/decline periods (Fig. 2 E, inset) to  
161 reconstruct effective sizes of individual populations through time (Fig. 2 E and Fig S5). All  
162 populations showed evidence of growth prior to the last glaciation, 500-20 thousand years ago  
163 (Fig 2 E), which aligned well with the fossil record of rising dominance of *Acropora* corals on  
164 Indo-Pacific reefs during this period (15). It has been suggested that the fast growth and early  
165 sexual maturation of *Acropora* corals gave them an advantage relative to most other reef-building  
166 corals during dynamic changes in the reef-forming zone due to the sea level changes  
167 accompanying glacial cycles (15). Our results suggest that *A. millepora* populations have been in  
168 stasis or slow decline since sea level changes abated (Fig. S5), although the inclusion of an  
169 additional growth/decline period only improved the model fit significantly for the Keppel  
170 population (Fig S6). None of the populations showed evidence of accelerated decline in effective  
171 population size over the past few hundred years. Although our samples were collected in the  
172 early-mid 2000s, our results are still relevant since they characterize populations only two-three  
173 coral generations ago. Disturbances that have affected corals since then would not yet have  
174 substantially impacted genetic diversity.

175  
176 To evaluate whether standing genetic variation contributed by local thermal adaptation could  
177 sustain evolution of the *A. millepora* metapopulation in response to warming, we have developed  
178 a multi-QTL model of metapopulation adaptation in SLiM (16). The model was parameterized  
179 with population sizes and migration rates inferred from the genetic analysis (Fig. 2 A, D), and  
180 with differences in midsummer monthly mean temperature among populations (Fig. 1 A). The

181 number of QTLs and their effect sizes, phenotypic plasticity (standard deviation of the Gaussian  
182 slope of fitness decline when phenotype mismatches the environment) and heritability (proportion  
183 of phenotypic variation attributable to genetics) can all be varied in the model. It can also  
184 incorporate climate scenarios with any combination of directional, cyclical and random changes.  
185 The model also allows for new mutations but here the new mutation rate was set to zero. This was  
186 to assess the contribution of only the standing genetic variation that was introduced into  
187 populations at the start of simulation as random QTL effects. The climate scenario started with a  
188 pre-adaptation to local thermal conditions for 2,000 generations. Assuming a generation time of  
189 of 5 years in *A. millepora* (17) this corresponded to the period of stable temperature since the last  
190 deglaciation. After pre-adaptation, the temperature was increased at a rate of 0.05°C/generation in  
191 all populations, corresponding to the projected 0.1°C warming per decade (18). Throughout the  
192 simulation temperature was allowed to fluctuate randomly between generations to approximate El  
193 Nino Southern Oscillation (ENSO): the temperature deviations were drawn from a normal  
194 distribution with a standard deviation of 0.25°C. The size of populations was kept constant  
195 throughout the pre-adaptation period and scaled linearly with the populations' relative fitness  
196 (mean current fitness divided by the mean fitness at the end of pre-adaptation period) during  
197 warming. Migration rates from a population also scaled linearly with the population's fitness. In  
198 this way, a population declining in fitness would shrink in size and stop contributing migrants to  
199 other populations.

200  
201 Our model suggested that, with only ten thermal QTLs, under all combinations of heritability and  
202 plasticity the pre-adapted metapopulation would be able to persist through the warming for at  
203 least 50-100 generations and, in some realistic cases, much longer (Fig. 3 and Figs. S7-S8).  
204 Migration in general and southward migration in particular substantially contributed to this  
205 persistence (Fig. 3 E, F), underscoring the importance of the spread of warm-adapted genotypes  
206 from lower to higher latitudes (4).

207  
208 Predictably, higher phenotypic plasticity promoted population persistence and stability against  
209 random thermal anomalies, but we were rather surprised to observe a similar positive effect of  
210 lower heritability, set to the values observed in coral quantitative genetics experiments (0.25-0.5,  
211 (17); Fig 3, Fig. S7). One specific reason why corals are expected to show low heritability of  
212 thermal tolerance is that much of natural variation in this trait in corals is due to the type of algal  
213 symbionts (*Symbiodinium* spp. (19)). Photo-symbionts are not transmitted from parent to  
214 offspring in the majority of coral species (20), and although host genetics can have some effect on  
215 the choice of *Symbiodinium* in the next generation (21) environment has a very strong effect on  
216 this association (19, 22). Higher persistence under low heritability and high plasticity is most  
217 likely explained by the fact that they both allow for higher standing genetic variation to be  
218 retained in populations (Fig. S9). During warming, this variation lasts longer as a source of  
219 adaptive genetic variants, enabling up to 5°C increase in mean thermal tolerance over 150  
220 generation (Fig. 3 G and Fig. S7). Higher plasticity partially rescued the drop in fitness due to low  
221 heritability (Fig. 3 B and D, Fig. S7). Another notable tendency observed with all parameter  
222 settings was that during warming the fitness (and hence the size) of adapting populations began to

223 fluctuate following random thermal anomalies, and the amplitude of these fitness fluctuations  
 224 increased as the warming progressed even though the amplitude of thermal anomalies did not  
 225 change (Fig. 3 H). These fluctuations correspond to severe mortality events induced by thermal  
 226 extremes due to ENSO and affected warm-adapted populations most, which very much resembles  
 227 the situation currently observed throughout the world (1).  
 228

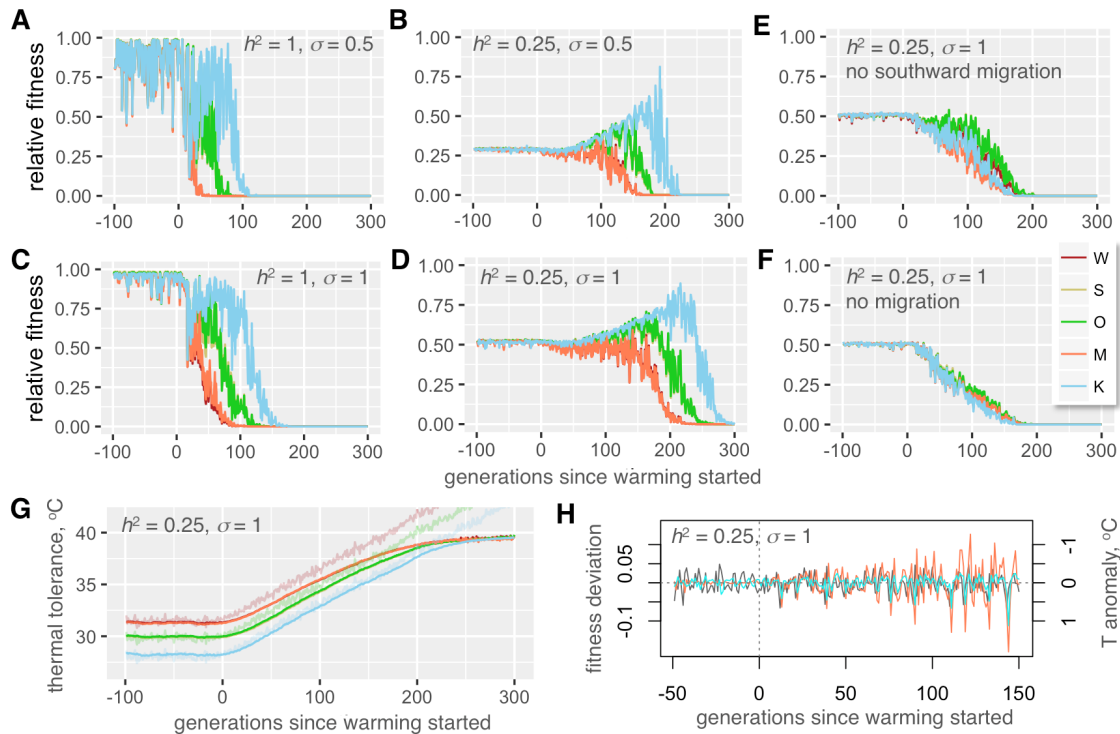

229  
 230 **Figure 3.** Modeling coral metapopulation persistence under global warming. (A-D) Fitness of modeled  
 231 populations depending on heritability of thermal tolerance ( $h^2$ , proportion of tolerance variation explained  
 232 by genetics), phenotypic plasticity ( $\sigma$ , standard deviation of the Gaussian slope of fitness decline away from  
 233 the phenotypic optimum, in degrees C), and presence-absence of migration (E, F). On panels A-F, y-axis is  
 234 observed fitness relative to maximal fitness at the genetically determined optimum, averaged over all  
 235 individuals in a population. Warm-adapted populations (W and M) are shown as red-tint traces, populations  
 236 from mild thermal regime (S and O) are green-tint traces, and the cool-adapted population (K) is the blue  
 237 trace. Note nearly complete overlap between traces for pairs of populations pre-adapted to the same  
 238 temperature (W,M and S,O). (G) Thermal tolerances of evolving populations. Thin noisy lines are modeled  
 239 temperatures at different locations. (H) Modeled random temperature anomalies (grey line) and fluctuations  
 240 in populations' fitness (the colored lines are residuals from loess regression over fitness traces on panel D;  
 241 Wilkie: orange line, Keppel: blue line). Note the inverse sign of temperature anomalies: this more clearly  
 242 shows the correspondence between rise in temperature and drop in fitness in the next generation. As  
 243 warming progresses, populations (especially originally warm-adapted ones) become increasingly sensitive  
 244 to random temperature fluctuations.

245  
 246 There are several uncertainties in our model associated with coral biology. Higher number of  
 247 QTLs and/or their larger effect sizes would promote higher genetic variation and lead to longer

248 population persistence. To keep the analysis conservative, our model included only ten QTLs,  
249 which is likely much fewer than the actual number of thermal QTLs in acroporid corals (20). We  
250 also kept the distribution of QTL effect sizes narrow: with the current settings and ten QTLs, at  
251 the start of simulation only about 2% of corals deviated from the mean thermal tolerance by more  
252 than 1.5°C in either direction. Such narrow variation makes adaptation to the thermal gradient of  
253 ~3°C along the GBR non-trivial, but still, at present there is no experimental data to evaluate  
254 whether even such narrow variation is realistic. Our model was also conservative in using  
255 effective population sizes suggested by genetic analysis as census sizes. In highly fecund marine  
256 organisms census sizes tend to substantially exceed effective population sizes, sometimes by  
257 orders of magnitude (23), which would strongly promote higher genetic diversity and population  
258 persistence. Moreover, we modeled only our five populations rather than the whole GBR, which  
259 would have resulted in much higher standing genetic variation in the metapopulation, promoting  
260 longer persistence.

261  
262 As for phenotypic plasticity, in simulations shown on Fig. 3,  $\sigma = 0.5$  and  $\sigma = 1$  corresponded to  
263 86% and 40% decline in fitness if the individual's phenotype mismatched the environment by  
264 1°C. The existing data on the issue of coral thermal plasticity are somewhat conflicting. One  
265 study shows that acroporid corals can successfully acclimatize to environments differing in  
266 maximum temperatures by as much as 2°C (24); however, another study found that coral grew  
267 52-80% more slowly when transplanted among locations differing by 1.5°C average temperature,  
268 (25). Although it is not possible to directly place these results into our quantitative plasticity  
269 framework, the former study supports the higher plasticity setting ( $\sigma = 1$ ) while the latter study  
270 supports  $\sigma = 0.5$ . It must also be noted that both these studies involved *in situ* transplantations and  
271 hence the effect of temperature remains confounded with other local fitness-affecting  
272 environmental parameters. Also, in adult corals plasticity is likely lower than in larvae and  
273 recruits, which are expected to exhibit non-reversible developmental plasticity associated with  
274 metamorphosis and establishment within a novel environment (26). Future experiments that  
275 expose multiple genetically distinct coral individuals to a range of temperatures under controlled  
276 laboratory settings are required to rigorously quantify variation in thermal optima and plasticity in  
277 natural populations.

278  
279 In conclusion, we found that genetic diversity and migration patterns of our study species were  
280 not yet affected by global warming and were well positioned to facilitate persistence of the GBR  
281 metapopulation for a century or more. However, local mortality events induced by thermal  
282 anomalies will be increasingly severe, especially among the originally warm-adapted populations.  
283 The 10-85% mortality in the Northern GBR as a result of 2016 bleaching event (27) could be a  
284 particularly sobering recent manifestation of this trend.

285  
286 More research into phenotypic plasticity and genetic variation in coral thermal tolerance and its  
287 genetic architecture (number of QTLs and their effect sizes) is needed to further improve the  
288 predictive power of our model. The estimated migration in the order of 10 - 100 migrants per  
289 generation could be feasibly facilitated by assisted gene flow efforts (28) without risking

290 disruption of the natural local adaptation patterns (29). Corals are declining on reef world-wide  
291 and there is an urgent need to develop new solutions to effectively manage the impacts of global  
292 processes such as climate change at local management scales. The broad characterization of  
293 genetic diversity, local thermal adaptation and migration pathways in multiple reef-building coral  
294 species would greatly inform both traditional spatial management and novel assisted gene flow  
295 approaches and should therefore be given high priority.

296

## 297 **Methods**

298

### 299 *Genotyping*

300

301 This study relied predominantly on samples described by van Oppen et al (9), with addition of  
302 several samples from Orpheus and Keppel islands that were used in the reciprocal transplantation  
303 experiment described by Dixon et al (30). The samples were genotyped using 2bRAD (7)  
304 modified for Illumina sequencing platform; the latest laboratory and bioinformatics protocols are  
305 available at [https://github.com/z0on/2bRAD\\_GATK](https://github.com/z0on/2bRAD_GATK). BcgI restriction enzyme was used and the  
306 samples retained for this analysis had 2.3-20.2 (median: 7.45) million reads after trimming and  
307 quality filtering (no duplicate removal was yet implemented in this 2bRAD version). The reads  
308 were mapped to the genome of the outgroup species, *Acropora digitifera* (31, 32), to polarize the  
309 allelic states into ancestral (as in *A. digitifera*) and derived, e.g., (33, 34). Genotypes were called  
310 using GATK pipeline (35).

311

312 Preliminary analysis of sample relatedness using vcftools (36) revealed that our samples included  
313 several clones: four repeats of the same genotype from the Keppel Island (van Oppen et al (9)  
314 samples K210, K212, K213 and K216), another duplicated genotype from Keppel (samples K211  
315 and K219), and one duplicated genotype from Magnetic Island (samples M16 and M17). All  
316 other samples were unrelated. We took advantage of these clonal replicates to extract SNPs that  
317 were genotyped with 100% reproducibility across replicates and, in addition, appeared as  
318 heterozygotes in at least two replicate pairs (script replicatesMatch.pl with hetPairs=2 option).  
319 These 7,904 SNPs were used as “true” SNP dataset to train the error model to recalibrate variant  
320 quality scores at the last stage of the GATK pipeline. During recalibration, we used the transition-  
321 transversion (Ts/Tv) ratio of 1.438 determined from the “true” SNPs to assess the number of false  
322 positives at each filtering threshold (as it is expected that an increase of false positive calls would  
323 decrease the Ts/Tv ratio towards unity). We chose the 95% tranche, with novel Ts/Tv = 1.451.  
324 After quality filtering that restricted the calls to only bi-allelic polymorphic sites, retained only  
325 loci genotyped in 95% or more of all individuals, and removed loci with the fraction of  
326 heterozygotes exceeding 0.6 (possible lumped paralogs), we ended up with 25,090 SNPs. In total,  
327 2bRAD tags interrogated 0.18% of the genome. The genotyping accuracy was assessed based on  
328 the match between genotyped replicates using script repMatchStats.pl. Overall agreement  
329 between replicates was 98.7% or better with the heterozygote discovery rate (fraction of matching  
330 heterozygote calls among replicates) exceeding 96%.

331



332 *Genome-wide genetic divergence*

333

334 To begin to characterize genome-wide divergence between populations we used pairwise  
335 genome-wide Weir and Cockerham's  $F_{ST}$  calculated by vcftools (36), principal component  
336 analysis (PCA) using R package adegenet (37), and ADMIXTURE (38). For PCA and  
337 ADMIXTURE, the data were thinned to keep SNPs separated by 5kb on average and by at least  
338 2.5 kb, choosing SNPs with highest minor allele frequency (script thinner.pl with options  
339 'interval=5000 criterion=maxAF').

340

341 *Demographic analysis and bootstrapping*

342

343 Prior to demographic analysis, Bayescan (39) was used to identify sites potentially under  
344 divergent selection among populations, and 13 such sites with q-value <0.05 were removed.  
345 Demographic models were fitted to 120 bootstrapped datasets, which were generated in two  
346 stages. First, five alternatively thinned datasets were generated for which SNPs were randomly  
347 drawn to be on average 5 kb apart and not closer than 2.5 kb. This time the SNPs were drawn at  
348 random to avoid distorting the allele frequency spectrum unlike thinning for PCA and  
349 ADMIXTURE where the highest minor allele frequency SNPs were selected. Then, 20  
350 bootstrapped replicates were generated for each thinned dataset by resampling contigs of the  
351 reference genome with replacement (script dadiBoot.pl). The fitted model parameters were  
352 summarized after excluding bootstrap replicates that fell into the lowest 15% likelihood quantile  
353 and the ones where model fitting failed to converge, leading to some parameters being  
354 undetermined or at infinity (less than 10% of total number of runs). Delta-AIC values were  
355 calculated for each bootstrap replicate that passed these criteria for both compared models, and  
356 summarized to obtain bootstrap support value, the percentage of replicates favoring the  
357 alternative model. While fitting *dadi* models, the data for each population were projected to  
358 sample sizes maximizing the number of segregating sites in the analysis, resulting in 7000-8172  
359 segregating sites per population.

360

361 *Unit conversion*

362

363 To convert *dadi*-reported coalescent parameter values ( $\theta$ ,  $T$  and  $M$ ) into time in years ( $t$ ), effective  
364 population sizes in number of individuals ( $N_e$ ) and migration rates as fraction of new immigrants  
365 per generation ( $m$ ), we estimated the mutation rate ( $\mu$ ) from the time-resolved phylogeny of  
366 *Acorpora* genus based on *paxC* intron (40), at 4e-9 per base per year. Although *A. millepora* was  
367 shown to start reproducing in 3 years (17) we assumed the generation time of 5 years reasoning  
368 that it would better reflect the attainment of full reproductive potential as the colony grows.  
369 Assuming a genome size of 5e+8 bases (31) the number of new mutations per genome per  
370 generation is 10. Since the fraction 2bRAD-sequenced genome in our experiment was 1.8e-3, the  
371 mutation rate per 2bRAD-sequenced genome fraction per generation is  $\mu = 0.018$ . This value was  
372 used to obtain:

373 - Ancestral effective population size:  $N_e = \theta / 2\mu$

374 - Migration rate:  $m = M / 2Ne$

375 - Time in years:  $t = 2TNe \cdot 5$

376

377 *Biophysical model*

378

379 A spatially-explicit biophysical modeling framework (11, 41) was used to quantify migration  
380 between coral reef habitats of the broader region surrounding the Great Barrier Reef, thereby  
381 revealing the location, strength, and structure of a species' potential population connectivity. The  
382 model's spatial resolution of ca. 8 km coincides with hydrodynamic data for the broader region  
383 (1/12.5 degree; HYCOM+NCODA Reanalysis and Analysis product; [hycom.org](http://hycom.org)). Our  
384 biophysical dispersal model relies on geographic data describing the seascape environment and  
385 biological parameters capturing coral-specific life-histories. Coral reef habitat data are available  
386 from the UNEP World Conservation Monitoring Centre (UNEP-WCMC; [http://data.unep-](http://data.unep-wcmc.org/datasets/1)  
387 [wcmc.org/datasets/1](http://data.unep-wcmc.org/datasets/1)) representing a globally-consistent and up-to-date representation of coral  
388 reef habitat. To capture specific inter-annual variability, two decades of hydrodynamic data were  
389 used from 1992 to 2013 (42).

390

391 Coral-specific biological parameters for *A. millipora* included relative adult density (dependent  
392 on the habitat), reproductive output, larval spawning time and periodicity (e.g., Magnetic Island  
393 populations spawn a month earlier than the other GBR sites (43)), maximum dispersal duration,  
394 pre-competency and competency periods, and larval mortality (44, 45). The spatially explicit  
395 dispersal simulations model the dispersal kernel (2-D surface) as a 'cloud' of larvae, allowing it  
396 to be concentrated and/or dispersed as defined by the bio-physical parameters. An advection  
397 transport algorithm is used for moving larvae within the flow fields (46).

398

399 Simulations were carried out by releasing a cloud of larvae into the model seascape at all  
400 individual coral reef habitat patches and allowing the larvae to be transported downstream by the  
401 currents. Ocean current velocities, turbulent diffusion, and larval behavior move the larvae  
402 through the seascape at each time-step. Larval competency, behavior, density, and mortality  
403 determine when and what proportion of larvae settle in habitat cells at each time step. When  
404 larvae encounter habitat, the concentration of larvae settling with the habitat is recorded at that  
405 time-step. From the dispersal data, we derived the coral migration matrix representing the  
406 proportion of settlers to each destination patch that came from a source patch, which is analogous  
407 to the source distribution matrix (47) and is equivalent to migration matrices derived from  
408 population genetic analysis. It is important to note that migration matrices extracted for the field  
409 sites represent the potential migration through all possible stepping-stones.

410

411 *Metapopulation adaptation model*

412

413 The model was implemented in SLiM the forward evolutionary simulator, by modifying the  
414 provided recipe "Quantitative genetics and phenotypically-based fitness". The model simulates  
415 Fisher-Wright populations with discreet generations. At the start of the simulation, populations

416 were established at specified population sizes and pairwise migration rates (genetic replacement  
417 rates), and all QTLs in all individuals were given a mutation with the effect size drawn from a  
418 normal distribution with mean zero and specified standard deviation, to create standing genetic  
419 variation. The phenotype of each individual was calculated as the sum of QTL effects plus  
420 random noise to simulate desired heritability. Then, fitness of each individual was calculated  
421 based on the difference between the individual's phenotype (thermal optimum), temperature of  
422 the environment, and the setting for phenotypic plasticity, modeled as the standard deviation of  
423 the Gaussian slope of fitness decline with increasing distance between phenotype and  
424 environment. Then, parents were chosen to produce the next generation according to their fitness;  
425 parents for immigrant individuals are chosen from among individuals in the source population.  
426 New mutations at QTLs happened at the specified rate when transitioning to the next generation  
427 and the effect of a new mutation replaced the previous QTL effect.

428

429 Our code was designed for general modeling of multilocus adaptation in metapopulations and can  
430 be customized easily. It is possible to adjust:

431

- 432 - Number of populations, their sizes, and pairwise migration rates. We modeled our five  
433 populations with effective population sizes and pairwise migration rates inferred by *dadi*.
- 434 - Number of QTLs and the distribution of their effect sizes. To keep the model conservative,  
435 we modeled only ten QTLs with normal distribution of effect sizes with a standard deviation  
436 of 0.2°C. With ten QTLs, this setting implied that at the start of simulation only about 2% of  
437 corals deviated from mean thermal tolerance by more than 1.5°C in either direction. Since  
438 thermal differences between our populations exceeded 3°C, this narrow variation made local  
439 adaptation rather non-trivial.
- 440 - Dominance of QTLs (set to 0.5 in our simulation).
- 441 - Phenotypic plasticity. We modeled three plasticity settings, 0.5, 1 and 2, which corresponded  
442 to 86%, 40% and 13% fitness drop when the individual's phenotypic optimum (calculated  
443 based on QTLs and heritability setting) mismatched the environment by 1°C.
- 444 - Heritability (proportion of phenotypic variation explained by genetics). We examined values  
445 1, 0.5, 0.25 and 1e-5, the latter to confirm that no adaptation or evolution was observed when  
446 the trait was not heritable.
- 447 - Mutation rate, which was set to zero because we wanted to explore only the role of standing  
448 genetic variation.
- 449 - Environmental changes, modeled as identical trends across populations with population-  
450 specific offsets. The trends can be any combination of linear, cyclical and random  
451 components. In the current simulation, environmental trends were offset by +1.6°C in Wilkie  
452 and Magnetic populations and by -1.8°C in the Keppel population, to model differences in  
453 midsummer monthly mean temperature among populations (Fig. 1). The trends included  
454 only random thermal anomalies (drawn from a normal distribution with a standard deviation  
455 of 0.25°C, to approximate ENSO events) for the first 2000 generations, after which a linear  
456 increase at 0.05°C per generation was added to simulate warming.

457

458 To better model population dynamics, we implemented linear scaling of the population size and  
459 immigration rates with the population's mean fitness post pre-adaptation period (the initial 2000  
460 generations with no linear change in environment). In this way, a population declining in fitness  
461 shrinks in size and stops contributing migrants to other populations.

462

463 All combinations of parameter settings were run ten times to ensure consistency. We found that  
464 with population sizes in thousands, such as in our case, the results were very consistent among  
465 independent runs. We therefore did not aggregate results over many replicated runs but show one  
466 randomly chosen run for each tested parameter combination.

467

#### 468 **Acknowledgements**

469

470 We wish to thank Ryan Gutenkunst and Benjamin Haller for their continuous support of *dadi* and  
471 SLiM users, respectively. The bioinformatics analysis was accomplished using computational  
472 resources of the Texas Advanced Computer Center. This study has been supported by NSF  
473 (DEB-1054766) grant to M.V.M, ARC (LP120200245) and University of Melbourne ECR grants  
474 to E. A.T., a Coral Reef Alliance grant ("Coral Adaptation Challenge") to E.A.T and M.V.M,  
475 Queensland Government funding to L.K.B and AIMS funding to L.K.B. and M.J.V.O

#### 476 **Data and code availability**

477 The finalized genotyping dataset in VCF format, detailed bioinformatic walkthrough, accessory  
478 formatting and plotting scripts, *dadi* scripts and the SLiM model code are available from  
479 <https://github.com/z0on/Adaptive-pathways-of-coral-populations-on-the-Great-Barrier-Reef>. Raw  
480 sequencing data has been deposited to National Center for Biotechnology Information's Short  
481 Reads Archive (accession number pending).

482

483 **References**

484

- 485 1. A. C. Baker, P. W. Glynn, B. Riegl, Climate change and coral reef bleaching: An ecological  
486 assessment of long-term impacts, recovery trends and future outlook. *Estuar. Coast. Shelf Sci.* **80**,  
487 435–471 (2008).
- 488 2. T. P. Hughes *et al.*, Climate change, human impacts, and the resilience of coral reefs. *Science*. **301**,  
489 929–933 (2003).
- 490 3. J. M. Pandolfi, S. R. Connolly, D. J. Marshall, A. L. Cohen, Projecting coral reef futures under  
491 global warming and ocean acidification. *Science*. **333**, 418–22 (2011).
- 492 4. G. B. B. Dixon *et al.*, Genomic determinants of coral heat tolerance across latitudes. *Science*. **348**,  
493 1460–1462 (2015).
- 494 5. P. K. Ingvarsson, Restoration of genetic variation lost – the genetic rescue hypothesis. *Trends Ecol.*  
495 *Evol.* **16**, 62–63 (2001).
- 496 6. G. De’ath, K. E. Fabricius, H. Sweatman, M. Puotinen, The 27-year decline of coral cover on the  
497 Great Barrier Reef and its causes. *Proc. Natl. Acad. Sci. U. S. A.* **109**, 17995–9 (2012).
- 498 7. S. Wang, E. Meyer, J. K. McKay, M. V Matz, 2b-RAD: a simple and flexible method for genome-  
499 wide genotyping. *Nat. Methods*. **9**, 808–810 (2012).
- 500 8. M. J. H. van Oppen, V. Lukoschek, R. Berkelmans, L. M. Peplow, A. M. Jones, A population  
501 genetic assessment of coral recovery on highly disturbed reefs of the Keppel Island archipelago in  
502 the southern Great Barrier Reef. *PeerJ*. **3**, e1092 (2015).
- 503 9. M. J. H. Van Oppen, L. M. Peplow, S. Kininmonth, R. Berkelmans, Historical and contemporary  
504 factors shape the population genetic structure of the broadcast spawning coral, *Acropora millepora*,  
505 on the Great Barrier Reef. *Mol. Ecol.* **20**, 4899–4914 (2011).
- 506 10. R. N. Gutenkunst, R. D. Hernandez, S. H. Williamson, C. D. Bustamante, Inferring the joint  
507 demographic history of multiple populations from multidimensional SNP frequency data. *PLoS*  
508 *Genet.* **5**, e1000695 (2009).
- 509 11. E. A. Treml, J. Roberts, P. N. Halpin, H. P. Possingham, C. Riginos, The emergent geography of  
510 biophysical dispersal barriers across the Indo-West Pacific. *Divers. Distrib.* **21**, 465–476 (2015).
- 511 12. E. A. Treml *et al.*, Reproductive Output and Duration of the Pelagic Larval Stage Determine  
512 Seascape-Wide Connectivity of Marine Populations. *Integr. Comp. Biol.* **52**, 525–537 (2012).
- 513 13. J. Lough, A. Hobday, Observed climate change in Australian marine and freshwater environments.  
514 *Mar. Freshw. Res.* **62**, 984–999 (2011).
- 515 14. B. Charlesworth, Fundamental concepts in genetics: Effective population size and patterns of  
516 molecular evolution and variation. *Nat. Rev. Genet.* **10**, 195–205 (2009).
- 517 15. W. Renema *et al.*, Are coral reefs victims of their own past success? *Sci. Adv.* **2**, e1500850 (2016).
- 518 16. B. C. Haller, P. W. Messer, SLiM 2: Flexible, interactive forward genetic simulations. *Mol. Biol.*  
519 *Evol.* **34**, 230–240 (2017).
- 520 17. M. Vanessa, B. Baria, D. W. Dela Cruz, R. D. Villanueva, J. R. Guest, Spawning of three-year-old  
521 *Acropora millepora* corals reared from larvae in Northern Philippines. *Bull. Mar. Sci.* **88**, 61–62  
522 (2012).
- 523 18. IPCC, *Climate Change 2007 - The Physical Science Basis. Contribution of Working Group I to the*  
524 *Fourth Assessment Report of the IPCC* (Cambridge University Press, New York, NY, 2007).
- 525 19. R. Berkelmans, M. J. H. van Oppen, The role of zooxanthellae in the thermal tolerance of corals: a  
526 “nugget of hope” for coral reefs in an era of climate change. *Proc. R. Soc. B-Biological Sci.* **273**,  
527 2305–2312 (2006).
- 528 20. A. H. Baird, J. R. Guest, B. L. Willis, Systematic and biogeographical patterns in the reproductive  
529 biology of scleractinian corals. *Annu. Rev. Ecol. Evol. Syst.* **40**, 551–571 (2009).
- 530 21. K. Quigley, B. Willis, L. Bay, Heritability of the Symbiodinium community in vertically- and  
531 horizontally-transmitting broadcast spawning corals. *bioRxiv*. doi: <https://doi.org/10.1101/100453>  
532 (2017).
- 533 22. E. J. Howells *et al.*, Coral thermal tolerance shaped by local adaptation of photosymbionts. *Nat.*  
534 *Clim. Chang.* **2** (2011), pp. 116–120.
- 535 23. F. P. Palstra, D. J. Fraser, Effective/census population size ratio estimation: a compendium and



- 536 appraisal. *Ecol. Evol.* **2**, 2357–2365 (2012).
- 537 24. S. R. Palumbi, D. J. Barshis, N. Traylor-Knowles, R. A. Bay, Mechanisms of reef coral resistance  
538 to future climate change. *Science*. **344**, 895–8 (2014).
- 539 25. E. J. Howells, R. Berkelmans, M. J. H. van Oppen, B. L. Willis, L. K. Bay, Historical thermal  
540 regimes define limits to coral acclimatization. *Ecology*. **94**, 1078–1088 (2013).
- 541 26. D. Nettle, M. Bateson, Adaptive developmental plasticity: what is it, how can we recognize it and  
542 when can it evolve? *Proc. R. Soc. B Biol. Sci.* **282**, 20151005 (2015).
- 543 27. Great Barrier Reef Marine Park Authority, *Interim report on the environmental impacts of the 2016*  
544 *coral bleaching event*.
- 545 28. O. Hoegh-Guldberg *et al.*, Assisted colonization and rapid climate change. *Science*. **321**, 345–346  
546 (2008).
- 547 29. S. N. Aitken, M. C. Whitlock, Assisted Gene Flow to Facilitate Local Adaptation to Climate  
548 Change. *Annu. Rev. Ecol. Evol. Syst.* **44**, 367–388 (2013).
- 549 30. G. B. Dixon, L. K. Bay, M. V. Matz, Bimodal signatures of germline methylation are linked with  
550 gene expression plasticity in the coral *Acropora millepora*. *BMC Genomics*. **15**, 1109 (2014).
- 551 31. C. Shinzato *et al.*, Using the *Acropora digitifera* genome to understand coral responses to  
552 environmental change. *Nature*. **476**, 320–U82 (2011).
- 553 32. M. J. H. van Oppen, B. J. McDonald, B. Willis, D. J. Miller, The Evolutionary History of the Coral  
554 Genus *Acropora* (Scleractinia, Cnidaria) Based on a Mitochondrial and a Nuclear Marker:  
555 Reticulation, Incomplete Lineage Sorting, or Morphological Convergence? *Mol. Biol. Evol.* **18**,  
556 1315–1329 (2001).
- 557 33. B. F. Voight, S. Kudravalli, X. Wen, J. K. Pritchard, A map of recent positive selection in the  
558 human genome. *PLoS Biol.* **4**, e72 (2006).
- 559 34. I. K. Jordan *et al.*, A universal trend of amino acid gain and loss in protein evolution. *Nature*. **433**,  
560 633–8 (2005).
- 561 35. A. Mckenna *et al.*, The Genome Analysis Toolkit: A MapReduce framework for analyzing next-  
562 generation DNA sequencing data. *Genome Res.* **20**, 1297–1303 (2010).
- 563 36. P. Danecek *et al.*, The variant call format and VCFtools. *Bioinformatics*. **27**, 2156–8 (2011).
- 564 37. T. Jombart, adegenet: a R package for the multivariate analysis of genetic markers. *Bioinformatics*.  
565 **24**, 1403–5 (2008).
- 566 38. D. H. Alexander, J. Novembre, K. Lange, Fast model-based estimation of ancestry in unrelated  
567 individuals. *Genome Res.* **19**, 1655–64 (2009).
- 568 39. T. Günther, G. Coop, Robust identification of local adaptation from allele frequencies. *Genetics*.  
569 **195**, 205–20 (2013).
- 570 40. Z. T. Richards, D. J. Miller, C. C. Wallace, Molecular phylogenetics of geographically restricted  
571 *Acropora* species: Implications for threatened species conservation. *Mol. Phylogenet. Evol.* **69**,  
572 837–851 (2013).
- 573 41. E. A. Treml, P. N. Halpin, D. L. Urban, L. F. Pratson, Modeling population connectivity by ocean  
574 currents, a graph-theoretic approach for marine conservation. *Landsc. Ecol.* **23**, 19–36 (2008).
- 575 42. E. P. Chassignet *et al.*, The HYCOM (HYbrid Coordinate Ocean Model) data assimilative system.  
576 *J. Mar. Syst.* **65**, 60–83 (2007).
- 577 43. R. C. Babcock *et al.*, Synchronous Spawnings of 105 Scleractinian Coral Species on the Great-  
578 Barrier-Reef. *Mar. Biol.* **90**, 379–394 (1986).
- 579 44. S. W. Davies, E. A. Treml, C. D. Kenkel, M. V. Matz, Exploring the role of Micronesian islands in  
580 the maintenance of coral genetic diversity in the Pacific Ocean. *Mol. Ecol.* **24**, 70–82 (2015).
- 581 45. S. R. Connolly, A. H. Baird, Estimating dispersal potential for marine larvae: dynamic models  
582 applied to scleractinian corals. *Ecology*. **91**, 3572–3583 (2010).
- 583 46. P. K. Smolarkiewicz, J. Szmelter, An MPDATA-based solver for compressible flows. *Int. J.*  
584 *Numer. Methods Fluids*. **56**, 1529–1534 (2008).
- 585 47. R. K. Cowen, G. Gawarkiewicz, J. Pineda, S. Thorrold, F. Werner, Population Connectivity in  
586 Marine Systems: An Overview. *Oceanography*. **20**, 14–21 (2007).
- 587

588 **Supplemental Figures**

589

590

591

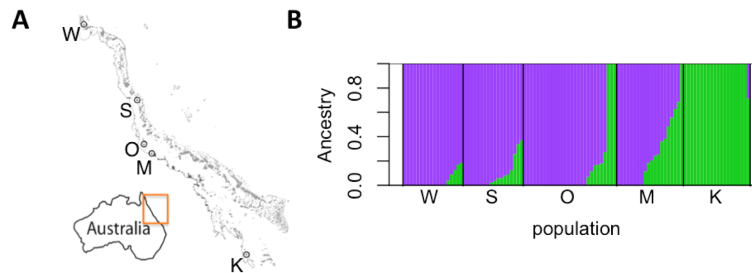

592

593

594

595

596

597

598

599

600

**Figure S1.** ADMIXTURE analysis of genetic differentiation between populations. (A) Map of sampled locations with one-letter population identifiers. (B) ADMIXTURE plot of ancestry proportions with  $K = 2$  (optimal  $K$  was 1).

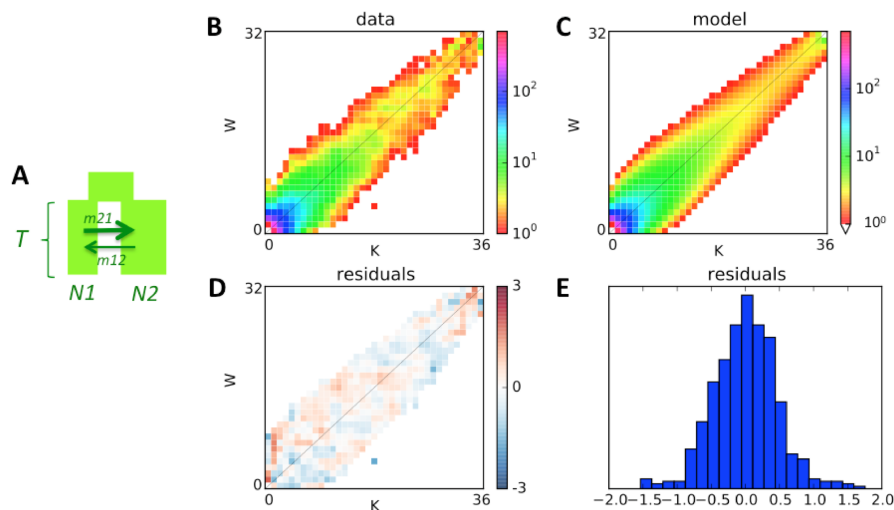

601

602

603

604

605

606

607

**Figure S2.** Example of two-population *dadl* model fit. (A) The model: ancestral population splits into two populations of unequal sizes ( $N1$  and  $N2$ ) some time  $T$  in the past, which exchange migrants with different rates depending on direction. (B) Observed allele frequency spectrum comparing Wilkie (W) and Keppel (K) populations. (C) Allele frequency spectrum generated by the fitted model. (D, E) Map and histogram of residuals (absolute scale).

608  
609  
610

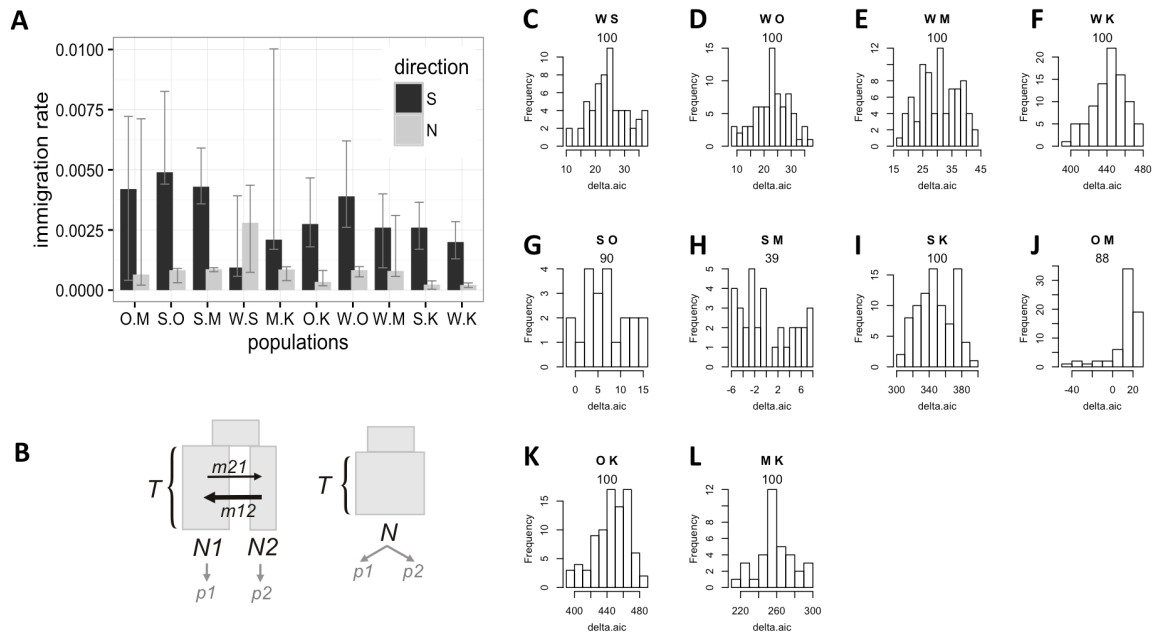

611  
612  
613  
614  
615  
616  
617  
618  
619  
620  
621  
622  
623  
624

**Figure S3.** Bootstrap analysis of migration rates and population subdivision using *dadi*. (A) Migration among population pairs, with bootstrap-derived 95% confidence intervals. The pairs are identified on the x-axis and sorted by increasing geographical distance. Black bars – southward migration, grey bars – northward migration. (B) Models being compared: the full model (left) implies populations' split into two different sizes ( $N1$  and  $N2$ ) at time  $T$  in the past, since when they exchanged migrants at unequal rates depending on direction. Reduced model allows for population size change at time  $T$  in the past but does not include population split: the two genotyped groups ( $p1$  and  $p2$ ) are regarded as two samples from the same population. (C-L) Histograms of delta-AIC values for 100 bootstrap replicates (bootstrap was performed over genomic contigs of the draft genome of *A. digitifera*). Positive numbers indicate support for the full model. The letters on top of each panel identify compared populations, the number is the proportion of positive bootstrap replicates (i.e., bootstrap support for the full model). The only comparison that did not receive >50% bootstrap support for population split is between S and M populations (panel H).

625  
626  
627  
628

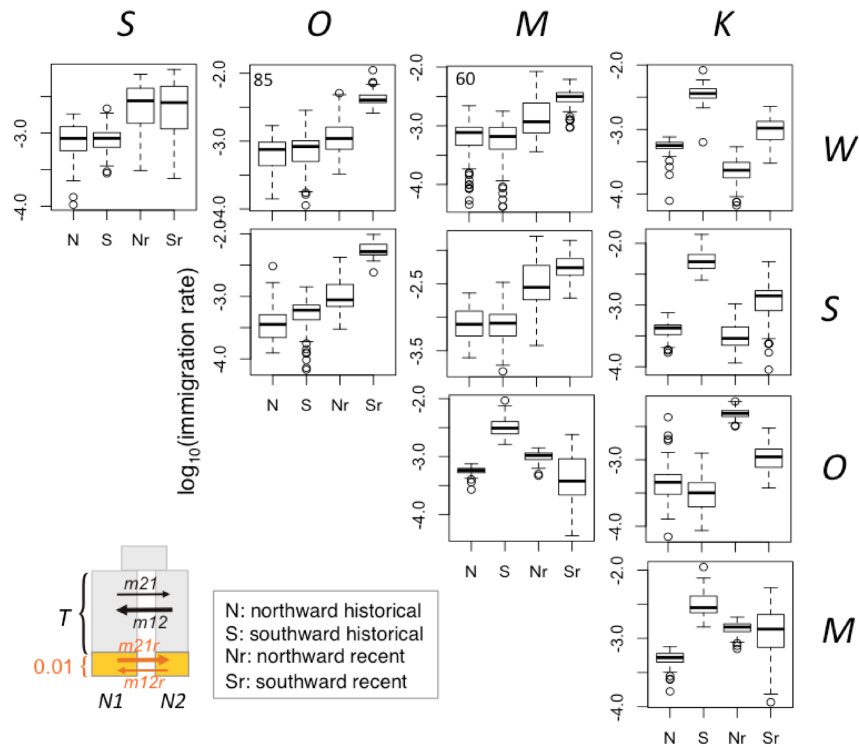

629  
630  
631  
632  
633  
634  
635  
636  
637  
638  
639  
640

Figure S4. Migration rates inferred by the *dadi* model allowing for the change in migration rates over the last 0.01  $T$  units (15-20 generations or 75-100 years, in our case). Box plots show historical (N, S) and recent (Nr, Sr) migration rates inferred among pairs of population across 100 bootstrap replicates. Numbers in the top left corner of the WO and WM plots are delta-AIC bootstrap support values for the model with the recent change in migration when compared to the split-with-migration model with no recent change (Fig. 1A). All other pairs had less than 50% delta-AIC bootstrap support. There is no consistent recent change in the preferential direction of migration.

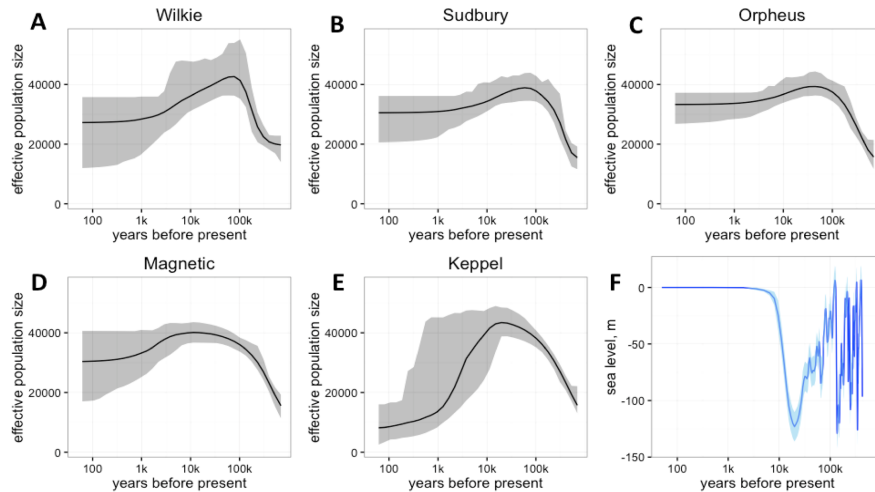

641  
642  
643  
644  
645

**Figure S5.** Population history. (A-E) Historical population sizes with bootstrap-derived 95% confidence intervals, according to the two-growth model (Fig. S6 A). (F) Sea level with shaded area corresponding to standard error (41).

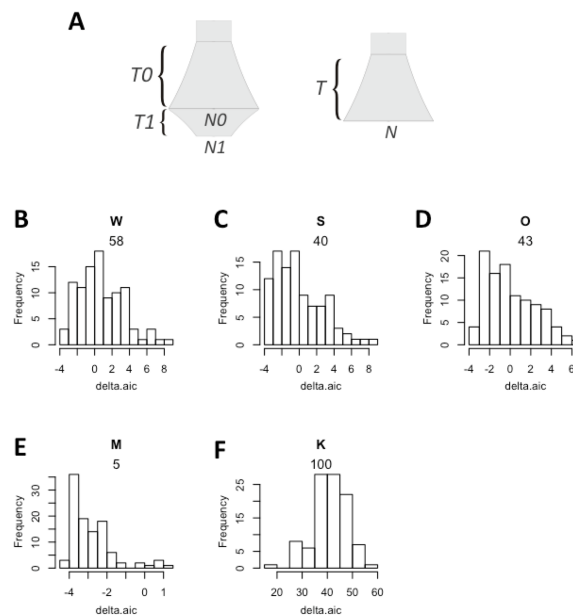

646  
647  
648  
649  
650  
651  
652  
653  
654  
655

**Figure S6.** Delta-AIC bootstrap analysis of single-population models. (A) Models compared. The full model (left) includes two exponential growth periods (any of which could be growth or decline), the reduced model (right) has only one growth period. (B-F) Histograms of delta-AIC values for 100 bootstrap replicates. Positive numbers indicate support for the full model. The letter on top of each panel identify the population, the number is the proportion of positive bootstrap replicates (i.e., bootstrap support for the full model). The two-growth model is strongly supported for population K (panel F) and marginally supported for population W (panel B).



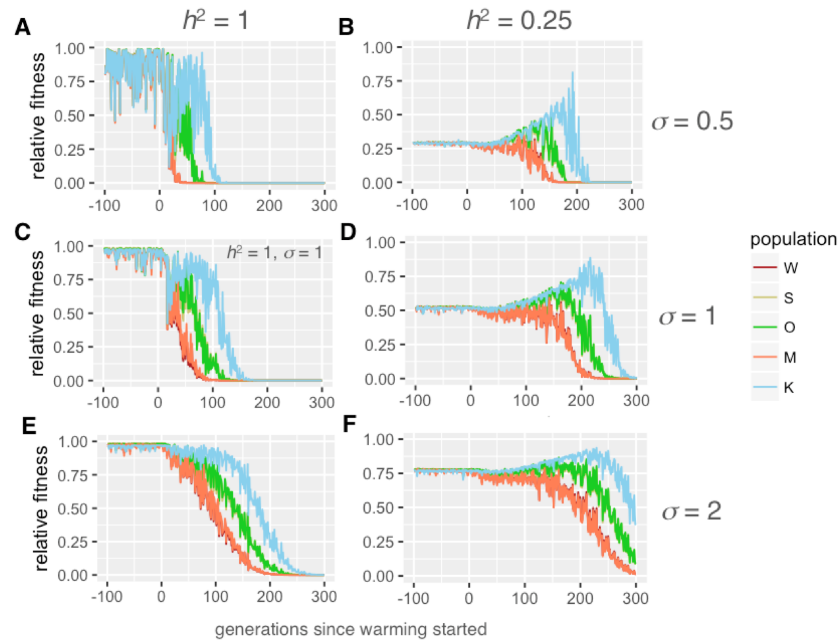

656  
657  
658  
659  
660  
661  
662  
663  
664  
665  
666  
667  
668

**Figure S7.** Fitness of modeled populations after pre-adaptation period and under warming, depending on heritability of thermal tolerance ( $h^2$ , proportion of phenotypic variation explained by genetics) and phenotypic plasticity ( $\sigma$ , standard deviation of the Gaussian slope of fitness decline away from the phenotypic optimum, in degrees C). X-axis is generations; warming starts at generation 0. Y-axis is fitness relative to maximal fitness at the genetically determined optimum. Warm-adapted populations (W and M) are shown as red-tint traces, populations from mild thermal regime (S and O) are green-tint traces, and the cool-adapted population (K) is the blue trace. Pairs of traces for warm- and mild-adapted populations largely overlap. (A, C, E):  $h^2=1$ . (B, D, F):  $h^2=0.25$ . (A, B):  $\sigma = 0.5$ . (C, D):  $\sigma = 1$ . (E, F):  $\sigma = 2$ . Higher plasticity facilitates metapopulation persistence during warming and confers stability against random fluctuations. Higher plasticity also partially rescues the drop in fitness achievable under low heritability (compare pre-warming generations, from -100 to 0, on panels B, D and F).

669

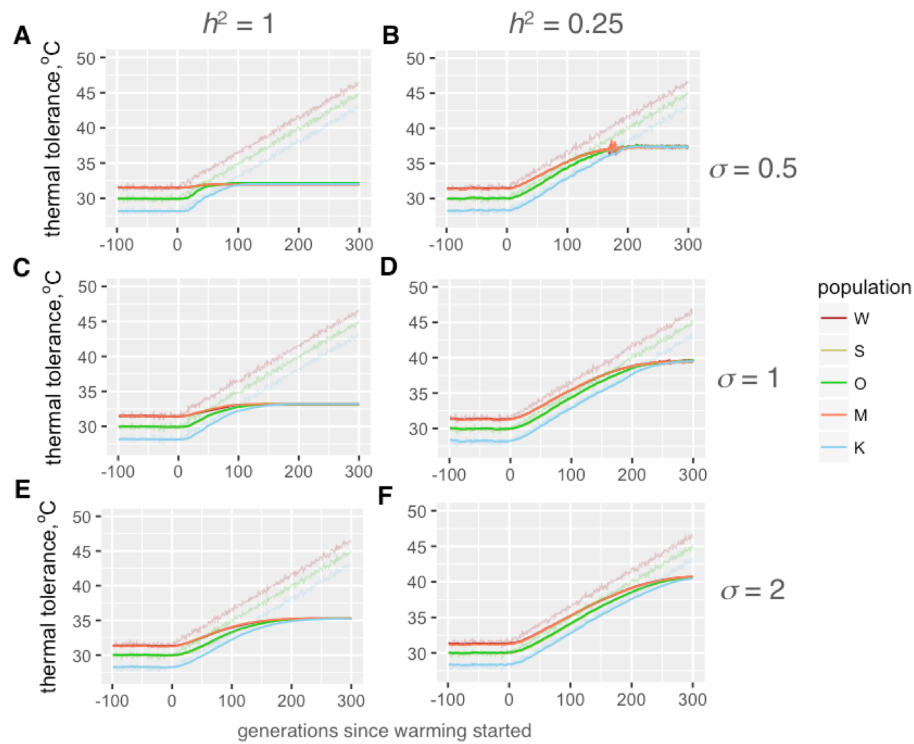

670

671

672

673

674

675

676

677

678

679

680

681

682

Figure S8. Higher plasticity and lower heritability promote longer and more extensive evolution in response to warming. The graphs show mean thermal tolerance of modeled populations after pre-adaptation period and under warming, depending on heritability of thermal tolerance ( $h^2$ , proportion of phenotypic variation explained by genetics) and phenotypic plasticity ( $\sigma$ , standard deviation of the Gaussian slope of fitness decline away from the phenotypic optimum, in degrees C). X-axis is generations; warming starts at generation 0. Y-axis is thermal tolerance (mean phenotype of the population). Warm-adapted populations (W and M) are shown as red-tint traces, populations from mild thermal regime (S and O) are green-tint traces, and the cool-adapted population (K) is the blue trace. Thin noisy lines are modeled temperatures at the corresponding locations. Pairs of traces for warm- and mild-adapted populations largely overlap. (A, C, E):  $h^2=1$ . (B, D, F):  $h^2=0.25$ . (A, B):  $\sigma = 0.5$ . (C, D):  $\sigma = 1$ . (E, F):  $\sigma = 2$ .

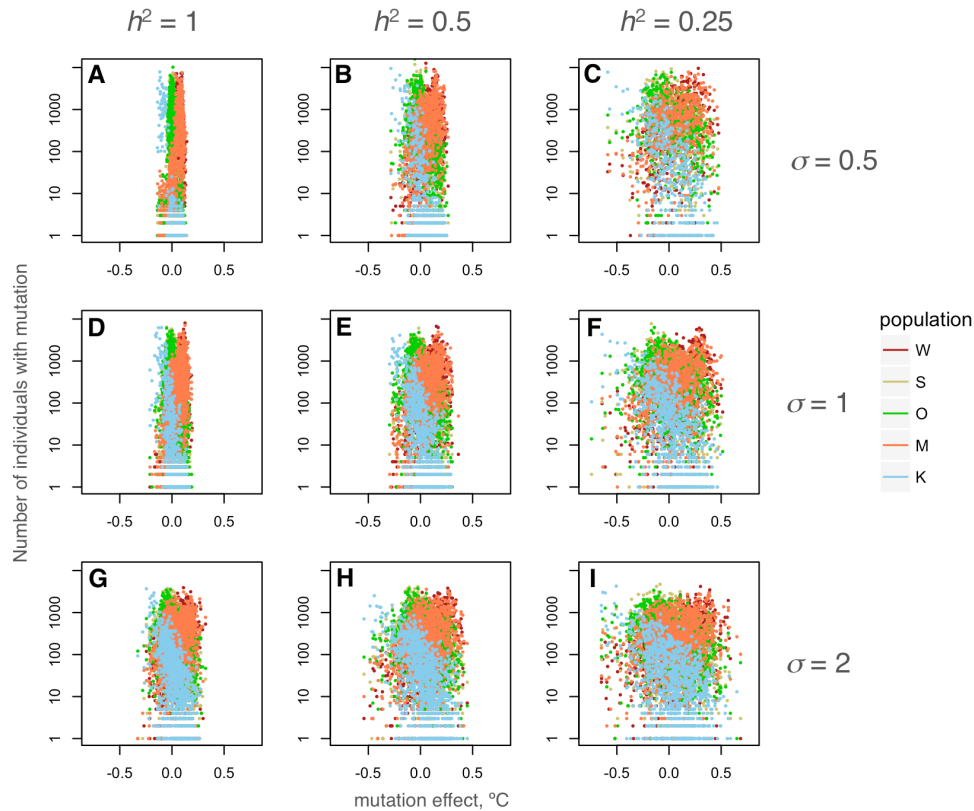

683  
684  
685  
686  
687  
688  
689  
690  
691  
692

**Figure S9.** Higher plasticity ( $\sigma$ ) and lower heritability ( $h^2$ ) promote retention of higher genetic variation in thermal tolerance. The scatterplots show the dependence of the number of individuals in a population bearing a mutation at a thermal QTL locus on the mutation's effect size (change in thermal tolerance, in °C) at the end of the pre-adaptation period (2000 generations with no directional change in temperature). The starting standing genetic variation was the same in all simulations. (A,D,E):  $h^2=1$ . (B,E,H):  $h^2=0.5$ . (C,F,I):  $h^2=0.25$ . (A-C):  $\sigma = 0.5$ . (D-F):  $\sigma = 1$ . (G-I):  $\sigma = 2$ . Populations are colored according to the color scheme used in Figures 3, S7 and S8 (see legend).
